# Supplementary material for: Integrated robotics platform with haptic control differentiates subjects with Parkinson’s disease from controls and quantifies the motor effects of levodopa
Source: Springer Nature journal article supplement (doi:10.1186/s12984-019-0598-5), 2019-10-26

# of parameters identifying impairment (1.5 s v 600 ms)

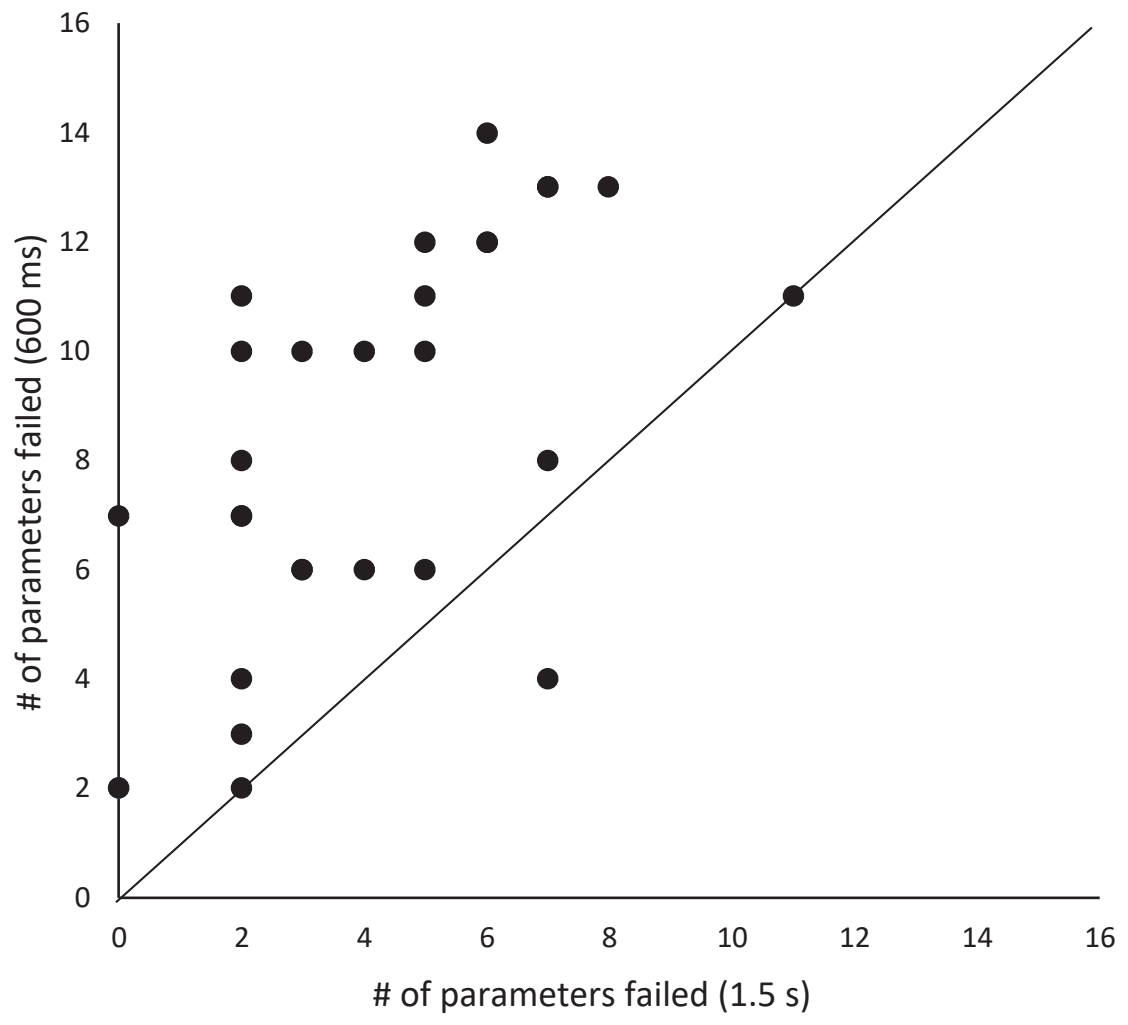

Supplement: MOESM1 [file 17310932]
